# Supplementary material for: Regulation of cyclic oligoadenylate synthesis by the Staphylococcus epidermidis Cas10-Csm complex
Source: PubMed Central journal article supplement — RNA. 2019 Aug;25(8):948–62. doi: 10.1261/rna.070417.119 (PMC6633199; doi:10.1261/rna.070417.119), 2019-08
Supplement: supp_070417.119_Supplemental_Material.pdf [file supp_070417.119_Supplemental_Material.pdf]

## Supporting Information

**Table S1. Mass spectrometry identification of 70 kDa band co-purifying with Cas10-Csm following ultracentrifugation.**

| Protein                                         | Uniparc accession | Theoretical mass (kDa) | Unique peptide count | Normalized spectral counts |
|-------------------------------------------------|-------------------|------------------------|----------------------|----------------------------|
| Type III-A CRISPR-associated protein Cas10/Csm1 | A0A199C221        | 88                     | 30                   | 41                         |
| Succinate dehydrogenase, flavoprotein subunit   | Q5HQ26            | 66                     | 15                   | 13.5                       |
| Phosphoglucomutase                              | A0A0E2MYC2        | 61                     | 5                    | 4.5                        |
| Glycosyltransferase, group 1 family protein     | A0A0E1VH90        | 59                     | 3                    | 2                          |
| Type III-A CRISPR-associated RAMP protein Csm5  | A0A199BF65        | 39                     | 3                    | 2.5                        |
| Asparagine--tRNA ligase                         | A0A0E1VCU9        | 49                     | 3                    | 2.5                        |
| Myosin-cross-reactive antigen                   | A0A0U5QGJ3        | 45                     | 2                    | 1.5                        |
| 4-hydroxy-tetrahydrodipicolinate reductase      | A0A017IRS9        | 29                     | 2                    | 2                          |
| Catalase                                        | A0A0E1VL99        | 58                     | 2                    | 1.5                        |
| Polyribonucleotide nucleotidyltransferase       | A0A0E1VF71        | 78                     | 2                    | 1.5                        |
| Glycosyl transferase                            | A0A199KU13        | 59                     | 2                    | 1.5                        |
| Type III-A CRISPR-associated RAMP protein Csm3  | A0A199C253        | 24                     | 2                    | 1.5                        |
| Type III-A CRISPR-associated protein Csm2       | A0A199KLT6        | 17                     | 2                    | 1.5                        |

**Table S2. Primers used in the construction of *pcrispr/csm3<sup>D32A</sup>*.**

| <b>Name</b> | <b>Sequence (5'-3')</b>        | <b>Purpose</b>                                                    |
|-------------|--------------------------------|-------------------------------------------------------------------|
| F027        | GGAGCAATTGCTTCTCCTGTAGTTAG     | Gibson assembly, <i>pcrispr-cas csm3<sup>D32A</sup></i>           |
| F014        | CGACTGTAAAAAGTACAGTCGGCATTAT   |                                                                   |
| F028        | CAGGAGAAGCAATTGCTCCAATCATAC    | Gibson assembly, <i>pcrispr-cas csm3<sup>D32A</sup></i>           |
| F016        | ACTGTACTTTTTACAGTCGGTTTTCTAATG |                                                                   |
| A426        | TTAAATTTTATTATGAAGCAGGACG      | Colony PCR confirmation of <i>pcrispr-cas csm3<sup>D32A</sup></i> |
| F004        | AATTTGTCTTGGGTTTGCAACTG        |                                                                   |
| A414        | CAAAGAGCTCGTCTACAAATTC         | Sequencing confirmation of <i>pcrispr-cas csm3<sup>D32A</sup></i> |
| A415        | ACAAGAACTGATTCAAGTGCTG         |                                                                   |
| A416        | TATTCTGAAAAGGTCAATCAAGG        |                                                                   |
| A417        | GCGATGCTTCATATCGTGCG           |                                                                   |
| A418        | CTACTTTAATAATTGAAAAAGATGG      |                                                                   |
| A419        | GTCTTTTAAATATCAGAACAGTTAC      |                                                                   |
| A420        | TTTAAAGTATATATCAGATTGTTTCG     |                                                                   |
| A421        | GCCGAAGTATATAAATCATCAG         |                                                                   |
| A422        | TTATGGTTATTCAATTCTCAGATC       |                                                                   |
| A423        | ATCAATTTTTGTCCCAATTTTCAG       |                                                                   |
| A424        | TTTTGTATACAGGTGGTGGCC          |                                                                   |
| A425        | CAAATTAAGTCTATATATTCAGGC       |                                                                   |
| A426        | TTAAATTTTATTATGAAGCAGGACG      |                                                                   |

**Table S3. Target RNAs**

| Name      | Method    | Sequence (5'-3')                                   | Description                                                                  |
|-----------|-----------|----------------------------------------------------|------------------------------------------------------------------------------|
| ssRNA-01  | Synthetic | CUUUGUACUGAUGAUUUUAUACUUCG<br>GCAUACGUUCUCUAAA     | Analog of <i>nes</i> transcript                                              |
| ssRNA-02  | Synthetic | CUUUGUACUGAUGAUUUUAUACUUCG<br>GCAUACGUUCAGAAAA     | Analog of <i>nes</i> transcript with no complementarity to the 5' tag region |
| ssRNA-03  | Synthetic | CUUUGUACUGAUGAUUUUAUACUUCG<br>GCAUACGUGUUCUCGU     | Complementary to <i>spc1</i> including the 5' tag region                     |
| ssRNA-NC  | Synthetic | GCUGACAUUAAGAUUACU AUUUUAUUAU<br>CCUUGCGAUUUUCUACG | Shuffled <i>nes</i> analog sequences with no complementarity to <i>spc1</i>  |
| ssRNA-500 | IVT       | GGCUUUGUACUGAUGAUUUUAUACUU<br>CGGCAUACGUUCUCUAAA   | Analog of <i>nes</i> transcript generated by IVT                             |
| ssRNA-501 | IVT       | GGCUUUGUACUGAUGAUUUUAUACUU<br>CGGCAUACGAUCUAAA     | Analog of <i>nes</i> transcript with a mismatch at +1                        |
| ssRNA-502 | IVT       | GGCUUUGUACUGAUGAUUUUAUACUU<br>CGGCAUACCUUCUCUAAA   | Analog of <i>nes</i> transcript with a mismatch at +2                        |
| ssRNA-503 | IVT       | GGCUUUGUACUGAUGAUUUUAUACUU<br>CGGCAUAGGUUCUCUAAA   | Analog of <i>nes</i> transcript with a mismatch at +3                        |
| ssRNA-504 | IVT       | GGCUUUGUACUGAUGAUUUUAUACUU<br>CGGCAUUCGUUCUCUAAA   | Analog of <i>nes</i> transcript with a mismatch at +4                        |
| ssRNA-505 | IVT       | GGCUUUGUACUGAUGAUUUUAUACUU<br>CGGCAAACGUUCUCUAAA   | Analog of <i>nes</i> transcript with a mismatch at +5                        |
| ssRNA-507 | IVT       | GGCUUUGUACUGAUGAUUUUAUACUU<br>CGGGAUACGUUCUCUAAA   | Analog of <i>nes</i> transcript with a mismatch at +7                        |
| ssRNA-508 | IVT       | GGCUUUGUACUGAUGAUUUUAUACUU<br>CGCCAUACGUUCUCUAAA   | Analog of <i>nes</i> transcript with a mismatch at +8                        |
| ssRNA-509 | IVT       | GGCUUUGUACUGAUGAUUUUAUACUU<br>CGGCAUACGUUCUCUAAA   | Analog of <i>nes</i> transcript with a mismatch at +9                        |
| ssRNA-510 | IVT       | GGCUUUGUACUGAUGAUUUUAUACUU<br>GGGCAUACGUUCUCUAAA   | Analog of <i>nes</i> transcript with a mismatch at +10                       |
| ssRNA-511 | IVT       | GGCUUUGUACUGAUGAUUUUAUACUA<br>CGGCAUACGUUCUCUAAA   | Analog of <i>nes</i> transcript with a mismatch at +11                       |
| ssRNA-512 | Synthetic | GGCUUUGUACUGAUGAUUUUAUACUU<br>CGGCAUACCUUCUCUAAA   | Analog of <i>nes</i> transcript with a mismatch at +2                        |
| ssRNA-515 | Synthetic | GGCUUUGUACUGAUGAUUUUAUACUU<br>CGGCAAACGUUCUCUAAA   | Analog of <i>nes</i> transcript with a mismatch at +5                        |
| ssRNA-517 | Synthetic | GGCUUUGUACUGAUGAUUUUAUACUU<br>CGGGAUACGUUCUCUAAA   | Analog of <i>nes</i> transcript with a mismatch at +7                        |
| ssRNA-518 | Synthetic | GGCUUUGUACUGAUGAUUUUAUACUU<br>CGCCAUACGUUCUCUAAA   | Analog of <i>nes</i> transcript with a mismatch at +8                        |

**Table S4. Overlap extension PCR primers for generation of IVT templates**

| <b>Name</b> | <b>Direction</b> | <b>Sequence (5'-3')</b>                                             | <b>Purpose</b>                                               |
|-------------|------------------|---------------------------------------------------------------------|--------------------------------------------------------------|
| prJAD500A   | F                | GAATTCTAATACGACTC<br>ACTATAGGCTTTGTACT<br>GATGATTTATATACTTC<br>GGCA | Introduces T7 promoter and templates 5' region of target RNA |
| prJAD500B   | R                | TTTAGAGAACGTATGCC<br>GAAGTATATAAATC                                 | Pairs to prJAD500A to generate ssRNA-500                     |
| prJAD501    | R                | TTTAGAGATCGTATGCC<br>GAAGTATATAAATC                                 | Pairs to prJAD500A to generate ssRNA-501                     |
| prJAD502    | R                | TTTAGAGAAGGTATGCC<br>GAAGTATATAAATC                                 | Pairs to prJAD500A to generate ssRNA-502                     |
| prJAD503    | R                | TTTAGAGAACCTATGCC<br>GAAGTATATAAATC                                 | Pairs to prJAD500A to generate ssRNA-503                     |
| prJAD504    | R                | TTTAGAGAACGAATGCC<br>GAAGTATATAAATC                                 | Pairs to prJAD500A to generate ssRNA-504                     |
| prJAD505    | R                | TTTAGAGAACGTTTGCC<br>GAAGTATATAAATC                                 | Pairs to prJAD500A to generate ssRNA-505                     |
| prMON507A   | F                | GAATTCTAATACGACTC<br>ACTATAGGCTTTGTACT<br>GATGATTTATATACTTC<br>GGGA | Introduces T7 promoter and templates 5' region of target RNA |
| prMON507B   | R                | TTTAGAGAACGTATCCC<br>GAAGTATATAAATC                                 | Pairs to prMON507A to generate ssRNA-507                     |
| prMON508A   | F                | GAATTCTAATACGACTC<br>ACTATAGGCTTTGTACT<br>GATGATTTATATACTTC<br>GCCA | Introduces T7 promoter and templates 5' region of target RNA |
| prMON508B   | R                | TTTAGAGAACGTATGCC<br>GAAGTATATAAATC                                 | Pairs to prMON508A to generate ssRNA-508                     |
| prMON509A   | F                | GAATTCTAATACGACTC<br>ACTATAGGCTTTGTACT<br>GATGATTTATATACTTCC<br>GCA | Introduces T7 promoter and templates 5' region of target RNA |
| prMON509B   | R                | TTTAGAGAACGTATGCG<br>GAAGTATATAAATC                                 | Pairs to prMON509A to generate ssRNA-509                     |
| prMON510A   | F                | GAATTCTAATACGACTC<br>ACTATAGGCTTTGTACT<br>GATGATTTATATACTTG<br>GGCA | Introduces T7 promoter and templates 5' region of target RNA |
| prMON510B   | R                | TTTAGAGAACGTATGCC<br>CAAGTATATAAATC                                 | Pairs to prMON510A to generate ssRNA-510                     |
| prMON511A   | F                | GAATTCTAATACGACTC<br>ACTATAGGCTTTGTACT<br>GATGATTTATATACTAC<br>GGCA | Introduces T7 promoter and templates 5' region of target RNA |
| prMON511B   | R                | TTTAGAGAACGTATGCC<br>GTAGTATATAAATC                                 | Pairs to prMON511A to generate ssRNA-511                     |
